# Supplementary material for: A novel modified PI separator with enhanced dendrite suppression, puncture prevention and improved size stability for room-temperature sodium–sulfur batteries
Source: Royal Society of Chemistry journal article supplement (doi:10.1039/d4nj04589k), 2024-12-21
Supplement: d4nj04589k1.pdf [file d4nj04589k1.pdf]

### Supporting Information for

## **A novel modified PI Separator with enhanced Dendrite-Suppressed and Puncture Prevention and Better size stability for Room Temperature Sodium-Sulfur Batteries**

Xiaoguang Jiao,<sup>a</sup> Chao Yang,<sup>a</sup> Kaixuan Ma,<sup>a</sup> Caihong Feng,<sup>a</sup> Qingze Jiao,<sup>a,b</sup> and Yun Zhao\*<sup>a</sup>

a. Beijing Key Laboratory for Chemical Power Source and Green Catalysis, School of Chemistry and Chemical Engineering, Beijing Institute of Technology, 5 South Zhongguancun Street, Haidian District, Beijing 100081, China.

b. School of Materials and Environment, Beijing Institute of Technology, Jinfeng Road No. 6, Xiangzhou District, Zhuhai 519085, China.

E-mail: [zhaoyun@bit.edu.cn](mailto:zhaoyun@bit.edu.cn)

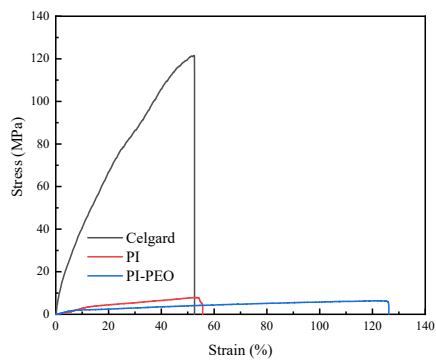

**Fig. S1.** Stress-strain curves of Celgard, PI and PI-PEO separators.

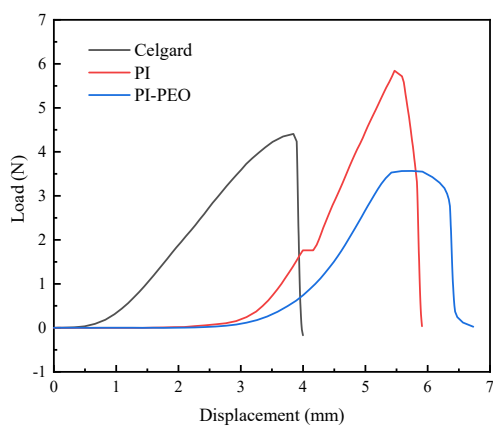

**Fig. S2.** Puncture experiment of Celgard, PI and PI-PEO separators.

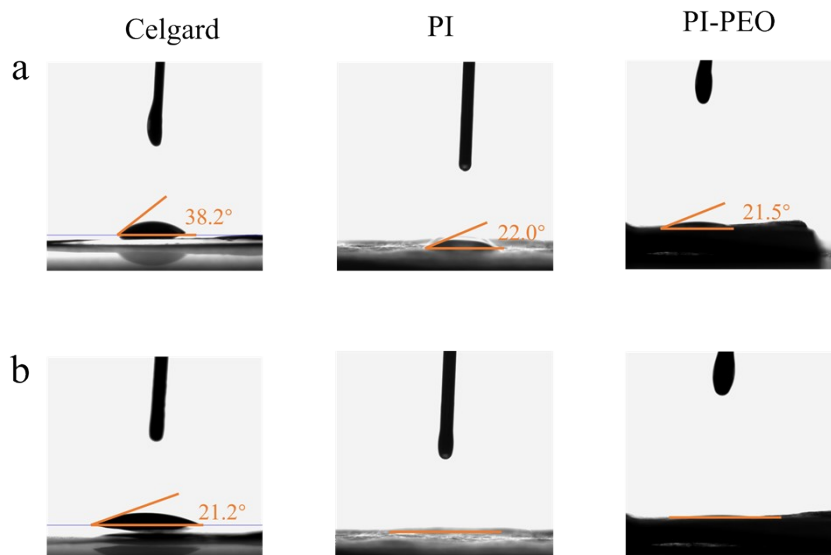

**Fig. S3.** (a) Contact angle between electrolyte and separators; (b) Contact angle between electrolyte and separators after 1 second.

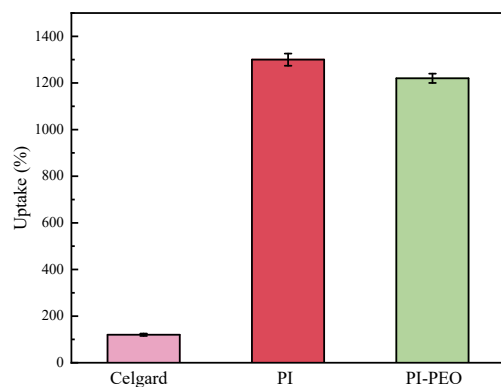

**Fig. S4.** Absorption rate of separators to electrolyte.

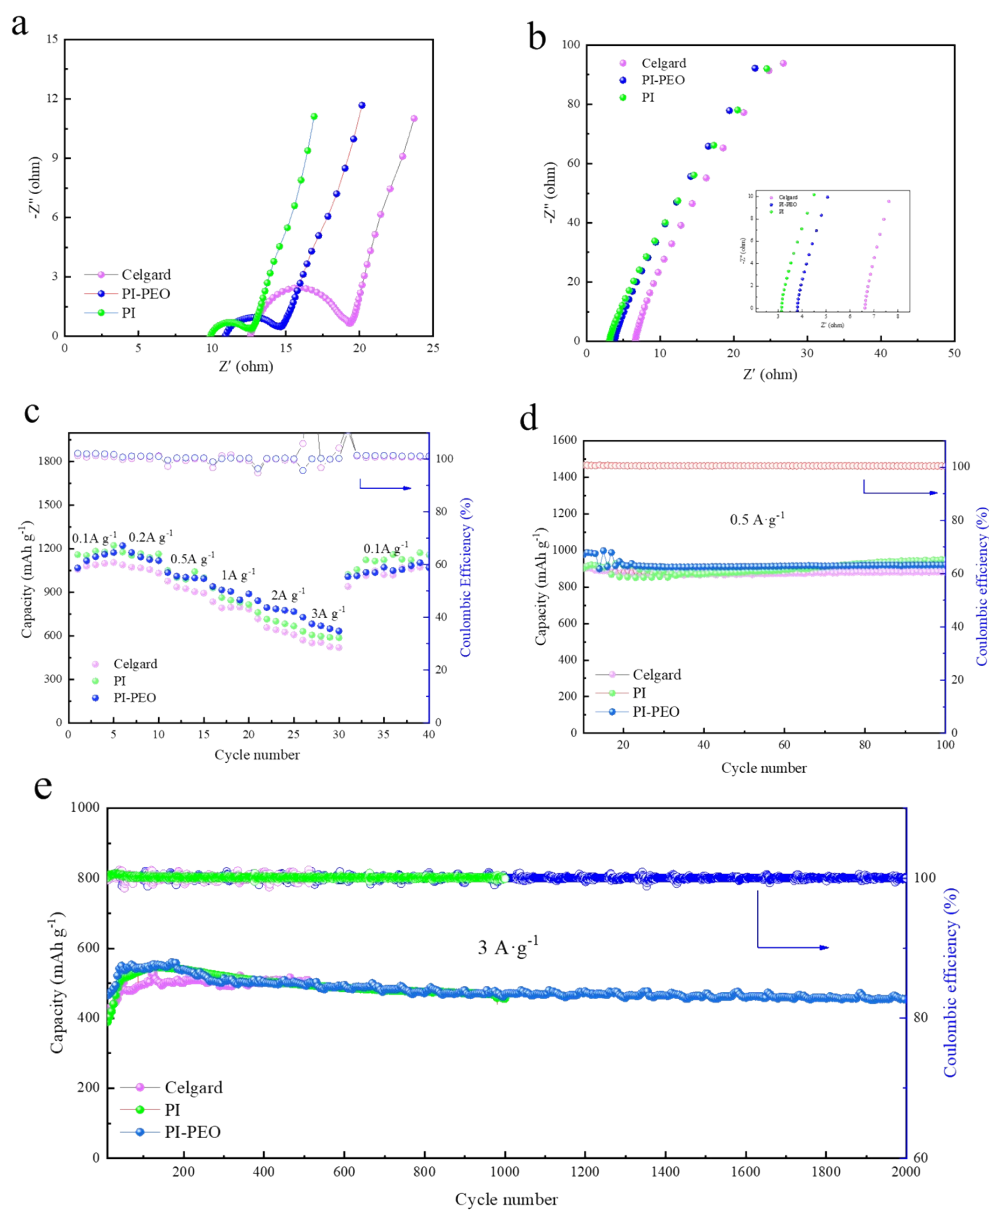

**Fig. S5.** Battery performances of different separators: (a) EIS curves based on SS|separator|SS; (b) EIS curves based on S|separator|Na; (c) Rate capacities; (d) Cycling performance at  $0.5A\ g^{-1}$ ; (e) Cycling performance at  $3A\ g^{-1}$ .
